# Supplementary material for: RNA Editing in Mitochondrial Trans-Introns Is Required for Splicing
Source: PubMed Central journal article supplement (PMC3527595; doi:10.1371/journal.pone.0052644), 2012-12-20
Supplement: pone.0052644.s001.pdf [file pone.0052644.s001.pdf]

**Supplemental S1. Primers used in this work.** (only sens primers are indicated)

Primers used to study the splicing branched intermediates

|     |                        |
|-----|------------------------|
| P1a | CACACTAGGCTACCCTTCTCCG |
| P2a | GCCGGAGGGTATTATTGCACA  |
| P3a | AGGCCGACGAGCGGTCCACG   |
| P1b | TTATGACGGTCACCAGGGCC   |
| P2b | ATTGTGACCTCGTACGATCGT  |
| P3b | GCTCCACGTACGGTTTTGAAG  |
| P4  | GACCAACGTCAGCGACAGAG   |
| P5  | TTGGCTGCCTATCCTAGATCT  |
| P6  | TACCTAAACCAATCATCATATC |

Primers used for the endogenous transcript (cDNA analysis):

|       |                       |
|-------|-----------------------|
| atp9F | ATGTTAGAAGGTGCTAAATC  |
| atp9R | CGATCGCATAAAAAGTCATGA |

Primers used for the analysis of the transplicing products:

|             |                                   |
|-------------|-----------------------------------|
| Pa1         | GTGCTAGCTGAACGTAAAGTAATGGCTTTTG   |
| Pa2         | TTGTGCAACGTCGAAAGGGT              |
| Pa3         | GATGTAGTGGGATCGTTC                |
| Pb1         | CGAAATATGCCTTTCTAGGAGCATTACGATCTG |
| Pb2         | AGCTCAAATGGTCTCTTATGAAG           |
| Pb3         | ctctattggtcttattcttattg           |
| Pc1         | GTCTAGCAGAACTAATCGAGCTCCGT        |
| Pc2         | CTCCAGAAGCGGAAGC                  |
| Pc3         | GAATTAGTTGCAGGCTATAAT             |
| Pd1         | ATGTAGAATATTCTTCAATG              |
| cob3' (1)AS | AGCCCTCATACCCACTCCTC              |
| cob3' (2)AS | TCCCGCGGGAAGCGGAAAGC              |
| cob3' (3)AS | TATCCAGATTTGGTACCAAACCC           |
| Dx1S        | TGTCCTGAAGAAGAAATTGTATACTCCCTT    |
| DX2S        | GGGATCTTTCAGCAGCGAATT             |

Primers used for *cloning mat-r-nadle* constructs. Restriction sites are underlined:

|          |                                  |
|----------|----------------------------------|
| Sac-MatR | atctgagagctccttccttaagagcctttcg  |
| Sac-Dx   | atctgagagctcgactccttgaaaagatggac |
| Nsi-MatR | atctgaatgcatcttccttaagagcctttcg  |
| Nsi-Dx   | atctgaatgcatgactccttgaaaagatggac |

SmaI-ex5nad1                   atctgacccggtcctgcccgcagccctattc  
Spe-ex5nad1                   atctgaactagtcctgcccgcagccctattc

Primers used for *site directed mutagenesis of the editing residue on the D6 of nad1e-I4*. Low-case letter indicate the modified residue:

mutCtoA-D6nad1-S           GGAGCTGCATCCaTACTCACCCGGT  
mutAtoT-revD6-S           GTTTCCTTTGAGAtGGGTGTGATACC
